# Supplementary material
Source: MDPI journal article supplement (https://www.mdpi.com/2254-9625/11/2/41)
Supplement: s1 [file s1]

| Scale                         | Number | Items                                                                                                         | Mean | S.D.  | Skewness | Kurtosis |
|-------------------------------|--------|---------------------------------------------------------------------------------------------------------------|------|-------|----------|----------|
| Family Relationships          | 1      | I keep my family members updated about my school performance                                                  | 3,44 | 1,086 | -0,150   | -0,641   |
| Fellow Students Relationships | 2      | I share, as much as possible, my doubts and my difficulties with my schoolmates                               | 2,94 | 0,983 | 0,048    | -0,412   |
| Teachers Relationships        | 3      | I think that almost all my teachers are available to dialogue                                                 | 2,71 | 0,897 | 0,062    | -0,208   |
| Intrinsic Motivation          | 4      | Most of the subjects that I study interest me                                                                 | 2,94 | 0,809 | -0,018   | -0,024   |
| Extrinsic Motivation          | 5      | Even on days when I am unmotivated, I manage to find the motivation in order to dedicate myself to my studies | 2,41 | 1,042 | 0,398    | -0,357   |
| Reaction to Failures          | 6      | I do not get discouraged by a lower grade than the one I thought I deserved                                   | 2,92 | 1,008 | 0,204    | -0,290   |
| Learning Assessment           | 7      | I can estimate with a good degree of accuracy whether I am ready for a test or an oral exam or not            | 3,52 | 0,853 | -0,162   | -0,019   |
| Time Management               | 8      | I can plan my activities so as not to have an impact on my studies                                            | 3,02 | 1,000 | 0,054    | -0,380   |
| General Self-Esteem           | 9      | I think I have good qualities in a lot of fields of my life                                                   | 3,27 | 0,869 | -0,084   | 0,139    |
| Study Self-Efficacy           | 10     | I think that I'm able to reach good results in my studies                                                     | 3,55 | 0,821 | -0,230   | 0,409    |
| Study Dedication              | 11     | I strive towards studying with a lot of commitment                                                            | 2,80 | 0,895 | 0,126    | 0,033    |
| Emotional Control             | 12     | I do not have excessive anxiety problems when I have an oral test or a written one                            | 2,72 | 1,146 | 0,217    | -0,726   |
| Family Relationships          | 13     | I believe it is really important to involve my family members in what concerns my studies                     | 2,71 | 1,092 | 0,228    | -0,566   |
| Fellow Students Relationships | 14     | When I need help, I ask my schoolmates                                                                        | 3,24 | 0,976 | -0,123   | -0,400   |
| Teachers Relationships        | 15     | In case I need it, I would not have difficulty asking my teachers for help                                    | 2,96 | 1,009 | 0,085    | -0,420   |

| Scale                         | Number | Items                                                                                                                    | Mean | S.D.  | Skewness | Kurtosis |
|-------------------------------|--------|--------------------------------------------------------------------------------------------------------------------------|------|-------|----------|----------|
| Intrinsic Motivation          | 16     | In most cases I study willingly because I like to do that                                                                | 2,24 | 0,890 | 0,380    | -0,097   |
| Extrinsic Motivation          | 17     | I am always able to find a way in order to start studying even when I am not really interested                           | 2,54 | 0,921 | 0,334    | -0,040   |
| Reaction to Failures          | 18     | I do not get discouraged if I fail a written or an oral test                                                             | 2,86 | 1,074 | 0,216    | -0,561   |
| Learning Assessment           | 19     | While I am getting ready for a test or an oral exam, I am sufficiently aware of the learning level I reach as I progress | 3,17 | 0,831 | -0,025   | 0,447    |
| Time Management               | 20     | I am able to plan my workload in order not to be late                                                                    | 2,70 | 1,031 | 0,277    | -0,325   |
| General Self-Esteem           | 21     | When I compare myself to the others, I realize I have good abilities                                                     | 3,19 | 0,835 | -0,111   | 0,392    |
| Study Self-Efficacy           | 22     | I consider myself a student with good study skills                                                                       | 3,16 | 0,842 | -0,185   | 0,360    |
| Study Dedication              | 23     | I work hard in my studies to get good grades                                                                             | 3,11 | 0,955 | 0,038    | -0,183   |
| Emotional Control             | 24     | Even if worked up, I can keep a clear head during a written or an oral test                                              | 3,08 | 1,027 | 0,014    | -0,443   |
| Family Relationships          | 25     | I ask my family for help when I have difficulty with a subject                                                           | 2,30 | 1,154 | 0,702    | -0,252   |
| Fellow Students Relationships | 26     | I was able to create a group of classmates to study with                                                                 | 2,44 | 1,215 | 0,475    | -0,672   |
| Teachers Relationships        | 27     | I have good relationships with all teachers                                                                              | 3,05 | 0,966 | -0,111   | -0,160   |
| Intrinsic Motivation          | 28     | The books I am studying deal with topics that I like                                                                     | 2,62 | 0,794 | -0,005   | 0,135    |
| Extrinsic Motivation          | 29     | Even on days when I am a bit unmotivated, I can find a way to study at least a little                                    | 2,57 | 0,944 | 0,434    | 0,126    |
| Reaction to Failures          | 30     | I do not get unmotivated because of my studying failures                                                                 | 2,79 | 1,012 | 0,208    | -0,309   |

| Scale                         | Number | Items                                                                                                | Mean | S.D.  | Skewness | Kurtosis |
|-------------------------------|--------|------------------------------------------------------------------------------------------------------|------|-------|----------|----------|
| Learning Assessment           | 31     | Before a written or an oral test, I can predict quite precisely what grade I will get                | 2,79 | 0,934 | -0,031   | -0,131   |
| Time Management               | 32     | I can devote each subject enough time in order to get good results                                   | 2,76 | 0,810 | 0,181    | 0,200    |
| General Self-Esteem           | 33     | I think I am a person with good potential                                                            | 3,52 | 0,878 | -0,139   | 0,048    |
| Study Self-Efficacy           | 34     | I have the rights skills to be able to achieve good results in studying                              | 3,58 | 0,861 | -0,192   | -0,032   |
| Study Dedication              | 35     | I am usually consistent in my studies                                                                | 2,57 | 0,936 | 0,341    | 0,090    |
| Emotional Control             | 36     | I face oral or written tests calmly                                                                  | 2,79 | 1,081 | 0,154    | -0,463   |
| Family Relationships          | 37     | I share my study difficulties with some of my family members                                         | 2,54 | 1,098 | 0,396    | -0,479   |
| Fellow Students Relationships | 38     | I often talk with my schoolmates about the best way to organize my studying activity                 | 2,58 | 1,005 | 0,174    | -0,514   |
| Teachers Relationships        | 39     | I think the teachers are helping me to develop my abilities                                          | 2,70 | 0,894 | 0,140    | 0,056    |
| Intrinsic Motivation          | 40     | Every subject teaches me something I am interested with                                              | 2,71 | 0,831 | 0,140    | 0,316    |
| Extrinsic Motivation          | 41     | I spend a lot of time on hobbies or friends provided that I have dedicated enough time to my studies | 2,93 | 1,140 | 0,128    | -0,744   |
| Reaction to Failures          | 42     | I do not get discouraged in front of difficulties that I encounter in my studies                     | 2,83 | 0,903 | 0,137    | -0,073   |
| Learning Assessment           | 43     | I can assess with some accuracy which subjects I am more or less prepared for                        | 3,51 | 0,777 | -0,159   | 0,375    |
| Time Management               | 44     | I can find the right balance between the time I use for studying and the time I use for leisure      | 2,80 | 1,027 | 0,241    | -0,372   |
| General Self-Esteem           | 45     | I have high self-esteem                                                                              | 3,01 | 1,186 | 0,010    | -0,775   |

| Scale               | Number | Items                                                               | Mean | S.D.  | Skewness | Kurtosis |
|---------------------|--------|---------------------------------------------------------------------|------|-------|----------|----------|
| Study Self-Efficacy | 46     | I can state that I am a good student                                | 2,98 | 0,904 | -0,028   | 0,188    |
| Study Dedication    | 47     | I approach studying with great tenacity                             | 2,70 | 0,860 | 0,025    | 0,156    |
| Emotional Control   | 48     | The idea of taking an oral or written test does not make me nervous | 2,68 | 1,152 | 0,329    | -0,623   |
